# Supplementary material for: Relationship of Blood and Urinary Manganese Levels with Cognitive Function in Elderly Individuals in the United States by Race/Ethnicity, NHANES 2011–2014
Source: MDPI journal article supplement (doi:10.3390/toxics10040191), 2022-04-14
Supplement: s1 [file s1]

# Supplementary Materials: Relationship of Blood and Urinary Manganese Levels with Cognitive Function in Elderly Individuals in the United States by Race/Ethnicity, NHANES 2011–2014

Arturo J. Barahona, Zoran Bursac, Emir Veledar, Roberto Lucchini, Kim Tieu and Jason R. Richardson

**Table S1.** Mn-Blood univariate analyses of the association between z-score and covariates ( $n = 2068$ ).

| Variables                   | Score Mean (SE)* | <i>F</i> value | <i>P</i> -value |
|-----------------------------|------------------|----------------|-----------------|
| Gender                      |                  | 14.85          | 0.0005          |
| Male                        | 0.16 (0.04)      |                |                 |
| Female                      | 0.32 (0.04)      |                |                 |
| Age (year)                  | -                | -20.38**       | <0.0001         |
| Race/ethnicity              |                  | 25.1           | <0.0001         |
| Hispanic                    | -0.28 (0.05)     |                |                 |
| NH White                    | 0.33 (0.05)      |                |                 |
| NH Black                    | -0.13 (0.05)     |                |                 |
| Other race                  | 0.14 (0.06)      |                |                 |
| Education                   |                  | 79.45          | <0.0001         |
| <High School                | -0.34 (0.05)     |                |                 |
| High School                 | 0.05 (0.05)      |                |                 |
| >High School                | 0.47 (0.04)      |                |                 |
| PIR                         |                  | 68.62          | <0.0001         |
| <=0.99                      | -0.30 (0.06)     |                |                 |
| >=1                         | 0.31 (0.04)      |                |                 |
| Marital Status              |                  | 14.18          | 0.0007          |
| Married/Living with partner | 0.31 (0.05)      |                |                 |
| Widowed/Divorced/Separated  | 0.10 (0.04)      |                |                 |
| Alcohol Consumption         |                  | 27.46          | <0.0001         |
| >12 drinks/yr               | 0.32 (0.05)      |                |                 |
| <12 drinks/yr               | 0.04 (0.03)      |                |                 |
| HTN                         |                  | 25.78          | <0.0001         |
| Yes                         | 0.15 (0.04)      |                |                 |
| No                          | 0.38 (0.04)      |                |                 |
| DM                          |                  | 26.97          | <0.0001         |
| Yes                         | -0.03 (0.04)     |                |                 |
| No                          | 0.31 (0.05)      |                |                 |
| CAD                         |                  | 28.41          | <0.0001         |
| Yes                         | -0.11 (0.06)     |                |                 |
| No                          | 0.28 (0.04)      |                |                 |
| Stroke                      |                  | 13.24          | 0.001           |
| Yes                         | -0.16 (0.10)     |                |                 |
| No                          | 0.27 (0.04)      |                |                 |

\*Weighted mean and SE; \*\*t-score.

**Table S2.** Mn-Blood levels (continuous) in relation to CERAD (delayed).

|                                | Model 1 ( <i>n</i> = 2068)*   |                 | Model 2 ( <i>n</i> = 1772)†   |                 | Model 3 ( <i>n</i> = 1744)‡   |                 | Model 4 ( <i>n</i> = 1650)§   |                 |
|--------------------------------|-------------------------------|-----------------|-------------------------------|-----------------|-------------------------------|-----------------|-------------------------------|-----------------|
| Variables                      | $\beta$ (95% CI) <sup>¶</sup> | <i>p</i> -value |
| Mn                             | 0.2 (−0.1 to 0.4)             | 0.2             | −0.03 (−0.3 to 0.2)           | 0.77            | −0.04 (−0.3 to 0.2)           | 0.76            | −0.04 (−0.3 to 0.2)           | 0.74            |
| Gender                         |                               |                 |                               |                 |                               |                 |                               |                 |
| Male                           |                               |                 | referent                      | referent        | referent                      | referent        | referent                      | referent        |
| Female                         |                               |                 | 8 (6 to 10)                   | <0.0001         | 8 (6 to 10)                   | <0.0001         | 0.8 (0.5 to 1)                | <0.0001         |
| Age (year)                     |                               |                 | −1 (−14 to −10)               | <0.0001         | −12 (−14 to −1)               | <0.0001         | −1 (−14 to −0.9)              | <0.0001         |
| Race/Ethnicity                 |                               |                 |                               |                 |                               |                 |                               |                 |
| NH White                       |                               |                 | referent                      | referent        | referent                      | referent        | referent                      | referent        |
| Hispanic                       |                               |                 | −7 (−10 to −2)                | 0               | −7 (−10 to −2)                | 0.01            | −7 (−10 to −2)                | 0.01            |
| NH Black                       |                               |                 | −4 (−7 to −0.4)               | 0.03            | −3 (−7 to −0.1)               | 0.05            | −3 (−6 to 1)                  | 0.15            |
| Other Race                     |                               |                 | 1.3 (−5 to 8)                 | 0.7             | 1 (−6 to 8)                   | 0.7             | 1 (−5 to 8)                   | 0.63            |
| Education                      |                               |                 |                               |                 |                               |                 |                               |                 |
| >High School                   |                               |                 | referent                      | referent        | referent                      | referent        | referent                      | referent        |
| High School                    |                               |                 | −5 (−9 to −1)                 | 0.01            | −5 (−9 to −1)                 | 0.01            | −6 (−10 to −2)                | 0.005           |
| <High School                   |                               |                 | −5 (−10 to −0.01)             | 0.05            | −5 (−10 to −0.1)              | 0.05            | −5 (−10 to 01)                | 0.05            |
| PIR                            |                               |                 |                               |                 |                               |                 |                               |                 |
| ≤0.99                          |                               |                 | referent                      | referent        | referent                      | referent        | referent                      | referent        |
| ≥1                             |                               |                 | 5 (1 to 8)                    | 0.01            | 5 (1 to 8)                    | 0.02            | 4 (1 to 8)                    | 0.02            |
| Marital Status                 |                               |                 |                               |                 |                               |                 |                               |                 |
| Married/Living with partner    |                               |                 | referent                      | referent        | referent                      | referent        | referent                      | referent        |
| Widowed/Divorced/<br>Separated |                               |                 | −0.9 (−5 to 3)                | 0.6             | −1 (−5 to 3)                  | 0.57            | −0.9 (−4 to 3)                | 0.6             |
| Alcohol Consumption            |                               |                 |                               |                 |                               |                 |                               |                 |
| <12 drinks/yr                  |                               |                 |                               |                 | referent                      | referent        | referent                      | referent        |
| >12 drinks/yr                  |                               |                 |                               |                 | 0.7 (−2 to 3)                 | 0.6             | 0.2 (−2 to 3)                 | 0.87            |
| HTN                            |                               |                 |                               |                 |                               |                 |                               |                 |
| No                             |                               |                 |                               |                 |                               |                 | referent                      | referent        |
| Yes                            |                               |                 |                               |                 |                               |                 | −0.7 (−4 to 2)                | 0.63            |
| DM                             |                               |                 |                               |                 |                               |                 |                               |                 |
| No                             |                               |                 |                               |                 |                               |                 | referent                      | referent        |

|        |               |          |
|--------|---------------|----------|
| Yes    | −4 (−7 to −2) | 0.002    |
| Stroke |               |          |
| No     | referent      | referent |
| Yes    | −1 (−7 to 5)  | 0.71     |
| CAD    |               |          |
| No     | referent      | referent |
| Yes    | −4 (−10 to 2) | 0.2      |

\*Unadjusted.† Adjusted for age, gender, ethnicity, education, PIR, and marital status. ‡ Adjusted for age, gender, ethnicity, education, PIR, marital status, and alcohol consumption. § Adjusted for age, gender, ethnicity, education, PIR, marital status, alcohol consumption, HTN, DM, stroke, and CAD. ¶ Weighted  $\beta$  and 95% Confidence Interval.

**Table S3.** Mn-Blood levels (continuous) in relation to DSST.

|                             | Model 1 ( <i>n</i> = 2068)* |                 | Model 2 ( <i>n</i> = 1772)† |                 | Model 3 ( <i>n</i> = 1744)‡ |                 | Model 4 ( <i>n</i> = 1650)§ |                 |
|-----------------------------|-----------------------------|-----------------|-----------------------------|-----------------|-----------------------------|-----------------|-----------------------------|-----------------|
| Variables                   | $\beta$ (95% CI)¶           | <i>P</i> -value |
| Mn                          | 0.5 (−2 to 3)               | 0.69            | −1 (−4 to 1)                | 0.26            | −1 (−4 to 1)                | 0.37            | −1 (−4 to 1)                | 0.4             |
| Gender                      |                             |                 |                             |                 |                             |                 |                             |                 |
| Male                        |                             |                 | referent                    | referent        | referent                    | referent        | referent                    | referent        |
| Female                      |                             |                 | 50 (40 to 60)               | <0.0001         | 60 (40 to 70)               | <0.0001         | 50 (40 to 70)               | <0.0001         |
| Age (year)                  |                             |                 | −10 (−10 to 10)             | <0.0001         | −10 (−10 to −8)             | <0.0001         | −10 (−11 to −8)             | <0.0001         |
| Race/Ethnicity              |                             |                 |                             |                 |                             |                 |                             |                 |
| NH White                    |                             |                 | referent                    | referent        | referent                    | referent        | referent                    | referent        |
| Hispanic                    |                             |                 | −120 (−140 to −100)         | <0.0001         | −120 (−140 to −100)         | <0.0001         | −120 (−150 to −100)         | <0.0001         |
| NH Black                    |                             |                 | −120 (−140 to −100)         | <0.0001         | −120 (−1300 to −10)         | <0.0001         | −110 (−130 to −90)          | <0.0001         |
| Other Race                  |                             |                 | −30 (−60 to −10)            | 0.01            | −30 (−60 to −10)            | 0.02            | 20 (−50 to 10)              | 0.03            |
| Education                   |                             |                 |                             |                 |                             |                 |                             |                 |
| >High School                |                             |                 | referent                    | referent        | referent                    | referent        | referent                    | referent        |
| High School                 |                             |                 | −80 (−100 to −60)           | <0.0001         | −80 (−90 to −60)            | <0.0001         | −70 (−100 to −50)           | <0.0001         |
| <High School                |                             |                 | −140 (−160 to −110)         | <0.0001         | −130 (−150 to −110)         | <0.0001         | −130 (−15 to −10)           | <0.0001         |
| PIR                         |                             |                 |                             |                 |                             |                 |                             |                 |
| ≤0.99                       |                             |                 | referent                    | referent        | referent                    | referent        | referent                    | referent        |
| ≥1                          |                             |                 | 80 (50 to 110)              | <0.0001         | 80 (40 to 110)              | <0.0001         | 80 (50 to 110)              | <0.0001         |
| Marital Status              |                             |                 |                             |                 |                             |                 |                             |                 |
| Married/Living with partner |                             |                 | referent                    | referent        | referent                    | referent        | referent                    | referent        |

|                                |                |      |                 |          |                  |          |
|--------------------------------|----------------|------|-----------------|----------|------------------|----------|
| Widowed/Divorced/<br>Separated | −10 (−30 to 5) | 0.17 | −10 (−30 to 10) | 0.15     | −10 (−30 to 10)  | 0.24     |
| Alcohol Consumption            |                |      |                 |          |                  |          |
| <12 drinks/yr                  |                |      | referent        | referent | referent         | referent |
| >12 drinks/yr                  |                |      | 30 (10 to 40)   | 0.004    | 20 (10 to 40)    | 0.01     |
| HTN                            |                |      |                 |          |                  |          |
| No                             |                |      |                 |          | referent         | referent |
| Yes                            |                |      |                 |          | −10 (−30 to 10)  | 0.09     |
| DM                             |                |      |                 |          |                  |          |
| No                             |                |      |                 |          | referent         | referent |
| Yes                            |                |      |                 |          | −40 (−60 to −20) | 0.001    |
| Stroke                         |                |      |                 |          |                  |          |
| No                             |                |      |                 |          | referent         | referent |
| Yes                            |                |      |                 |          | −10 (−40 to 20)  | 0.37     |
| CAD                            |                |      |                 |          |                  |          |
| No                             |                |      |                 |          | referent         | referent |
| Yes                            |                |      |                 |          | −40 (−70 to −20) | 0.004    |

\*Unadjusted.† Adjusted for age, gender, ethnicity, education, PIR, and marital status. ‡ Adjusted for age, gender, ethnicity, education, PIR, marital status, and alcohol consumption. § Adjusted for age, gender, ethnicity, education, PIR, marital status, alcohol consumption, HTN, DM, stroke, and CAD. ¶ Weighted  $\beta$  and 95% Confidence Interval.

**Table S4.** Mn-Blood levels (continuous) in relation to z-score.

|                | Model 1 ( <i>n</i> = 2068)* |                 | Model 2 ( <i>n</i> = 1772)† |                 | Model 3 ( <i>n</i> = 1744)‡ |                 | Model 4 ( <i>n</i> = 1650)§ |                 |
|----------------|-----------------------------|-----------------|-----------------------------|-----------------|-----------------------------|-----------------|-----------------------------|-----------------|
| Variables      | $\beta$ (95% CI)¶           | <i>P</i> -value |
| Mn             | 0.001 (−0.09 to 0.1)        | 0.9821          | −0.1 (−0.1 to 0.01)         | 0.057           | 0.1 (−0.1 to 0.01)          | 0.081           | −0.1 (−0.2 to 0.02)         | 0.101           |
| Gender         |                             |                 |                             |                 |                             |                 |                             |                 |
| Male           |                             |                 | referent                    | referent        | referent                    | referent        | referent                    | referent        |
| Female         |                             |                 | 2.4 (2 to 3)                | <0.0001         | 2.6 (2 to 4)                | <0.0001         | 2.6 (2 to 3)                | <0.0001         |
| Age (year)     |                             |                 | −0.5 (−1 to −0.5)           | <0.0001         | −0.5 (−0.5 to −0.4)         | <0.0001         | −0.5 (−0.6 to −0.4)         | <0.0001         |
| Race/Ethnicity |                             |                 |                             |                 |                             |                 |                             |                 |
| NH White       |                             |                 | referent                    | referent        | referent                    | referent        | referent                    | referent        |
| Hispanic       |                             |                 | −4.3 (−6 to −3)             | <0.0001         | −4.2 (−5 to −3)             | <0.0001         | −4.3 (−6 to −3)             | <0.0001         |
| NH Black       |                             |                 | −3.9 (−5 to −3)             | <0.0001         | −3.7 (−0.5 to −3)           | <0.0001         | −3.4 (−0.4 to −2)           | <0.0001         |
| Other Race     |                             |                 | −1.8 (−3 to −0.6)           | 0.006           | −1.7 (−3 to −0.4)           | 0.01            | −1 (−3 to −0.3)             | 0.019           |

|                                |                 |          |                   |          |                  |          |
|--------------------------------|-----------------|----------|-------------------|----------|------------------|----------|
| Education                      |                 |          |                   |          |                  |          |
| >High School                   | referent        | referent | referent          | referent | referent         | referent |
| High School                    | −3.6 (−5 to −3) | <0.0001  | −3 (−0.5 to −0.3) | <0.0001  | −3.5 (−4 to −3)  | <0.0001  |
| <High School                   | −5 (−6 to −4)   | <0.0001  | −4.9 (−6 to −3)   | <0.0001  | −4.7 (−6 to −3)  | <0.0001  |
| PIR                            |                 |          |                   |          |                  |          |
| ≤0.99                          | referent        | referent | referent          | referent | referent         | referent |
| ≥1                             | 2.9 (2 to 4)    | <0.0001  | 2.9 (2 to 4)      | 0.0001   | 2.8 (2 to 4)     | 0.0001   |
| Marital Status                 |                 |          |                   |          |                  |          |
| Married/Living with partner    | referent        | referent | referent          | referent | referent         | referent |
| Widowed/Divorced/<br>Separated | −0.5 (−2 to 1)  | 0.387    | −0.5 (−2 to 1)    | 0.371    | −0.4 (−1 to 1)   | 0.425    |
| Alcohol Consumption            |                 |          |                   |          |                  |          |
| <12 drinks/yr                  |                 |          | referent          | referent | referent         | referent |
| >12 drinks/yr                  |                 |          | 1 (0.2 to 2)      | 0.02     | 1 (0.1 to 2)     | 0.034    |
| HTN                            |                 |          |                   |          |                  |          |
| No                             |                 |          |                   |          | referent         | referent |
| Yes                            |                 |          |                   |          | −1 (−2 to 0.1)   | 0.078    |
| DM                             |                 |          |                   |          |                  |          |
| No                             |                 |          |                   |          | referent         | referent |
| Yes                            |                 |          |                   |          | −1.7 (−2 to −1)  | <0.0001  |
| Stroke                         |                 |          |                   |          |                  |          |
| No                             |                 |          |                   |          | referent         | referent |
| Yes                            |                 |          |                   |          | −0.6 (−2 to 1)   | 0.444    |
| CAD                            |                 |          |                   |          |                  |          |
| No                             |                 |          |                   |          | referent         | referent |
| Yes                            |                 |          |                   |          | −1.8 (−4 to 0.1) | 0.065    |

\*Unadjusted. † Adjusted for age, gender, ethnicity, education, PIR, and marital status. ‡ Adjusted for age, gender, ethnicity, education, PIR, marital status, and alcohol consumption. § Adjusted for age, gender, ethnicity, education, PIR, marital status, alcohol consumption, HTN, DM, stroke, and CAD. ¶ Weighted  $\beta$  and 95% Confidence Interval.

**Table S5.** Mn-Urine univariate analyses of the association between z-score and covariates ( $n = 950$ ).

| Variables                   | Score Mean (SE)* | F value | P-value |
|-----------------------------|------------------|---------|---------|
| Gender                      |                  | 94.11   | <0.0001 |
| Male                        | 0.13 (0.05)      |         |         |
| Female                      | 0.32 (0.05)      |         |         |
| Age (year)                  | -                | 4.58**  | <0.0001 |
| Race/ethnicity              |                  | 29.4    | <0.0001 |
| Hispanic                    | −0.31 (0.05)     |         |         |
| NH White                    | 0.33 (0.05)      |         |         |
| NH Black                    | −0.07 (0.04)     |         |         |
| Other race                  | 0.03 (0.1)       |         |         |
| Education                   |                  | 64      | <0.0001 |
| <High School                | −0.37 (0.05)     |         |         |
| High School                 | 0.02 (0.06)      |         |         |
| >High School                | 0.46 (0.05)      |         |         |
| PIR                         |                  | 37.18   | <0.0001 |
| ≤0.99                       | −0.28 (0.06)     |         |         |
| ≥1                          | 0.31 (0.05)      |         |         |
| Marital Status              |                  | 23.86   | <0.0001 |
| Married/Living with partner | 0.29 (0.05)      |         |         |
| Widowed/Divorced/Separated  | 0.09 (0.06)      |         |         |
| Alcohol Consumption         |                  | 21.89   | <0.0001 |
| >12 drinks/yr               | 0.31 (0.05)      |         |         |
| <12 drinks/yr               | 0.04 (0.05)      |         |         |
| HTN                         |                  | 38.67   | <0.0001 |
| Yes                         | 0.13 (0.06)      |         |         |
| No                          | 0.37 (0.06)      |         |         |
| DM                          |                  | 30.96   | <0.0001 |
| Yes                         | −0.01 (0.05)     |         |         |
| No                          | 0.29 (0.05)      |         |         |
| CAD                         |                  | 38.69   | <0.0001 |
| Yes                         | −0.23 (0.07)     |         |         |
| No                          | 0.28 (0.04)      |         |         |
| Stroke                      |                  | 31.63   | <0.0001 |
| Yes                         | −0.11 (0.2)      |         |         |
| No                          | 0.24 (0.04)      |         |         |

\*Weighted mean and SE; \*\*t-score

**Table S6.** Mn-Urine levels (continuous) in relation to CERAD (delayed).

|                             | Model 1 ( <i>n</i> = 2068)* |                 | Model 2 ( <i>n</i> = 1772)† |                 | Model 3 ( <i>n</i> = 1744)‡ |                 | Model 4 ( <i>n</i> = 1650)§ |                 |
|-----------------------------|-----------------------------|-----------------|-----------------------------|-----------------|-----------------------------|-----------------|-----------------------------|-----------------|
| Variables                   | β (95% CI)¶                 | <i>P</i> -value |
| Mn                          | 0.4 (−1 to 2)               | 0.54            | 0.1 (−2 to 0.20)            | 0.96            | 0.1 (−2 to 2)               | 0.95            | −3 (−5 to 0.1)              | 0.06            |
| Gender                      |                             |                 |                             |                 |                             |                 |                             |                 |
| Male                        |                             |                 | referent                    | referent        | referent                    | referent        | referent                    | referent        |
| Female                      |                             |                 | 8 (7 to 10)                 | <0.0001         | 8 (7 to 10)                 | <0.0001         | 8 (5 to 10)                 | <0.0001         |
| Age (year)                  |                             |                 | −1 (−2 to −1)               | <0.0001         | −13 (−16 to −1)             | <0.0001         | −1.2 (−2 to −0.9)           | <0.0001         |
| Race/Ethnicity              |                             |                 |                             |                 |                             |                 |                             |                 |
| NH White                    |                             |                 | referent                    | referent        | referent                    | referent        | referent                    | referent        |
| Hispanic                    |                             |                 | −10 (−15 to −4)             | 0.001           | −10 (−15 to −4)             | 0.002           | −10 (−16 to −5)             | 0.001           |
| NH Black                    |                             |                 | −4 (−7 to −0.5)             | 0.03            | −3 (−7 to −0.5)             | 0.02            | −4 (−7 to −0.3)             | 0.03            |
| Other Race                  |                             |                 | −0.6 (−7 to 6)              | 0.84            | −0.7 (−6 to 5)              | 0.81            | −1 (−7 to 5)                | 0.7             |
| Education                   |                             |                 |                             |                 |                             |                 |                             |                 |
| >High School                |                             |                 | referent                    | referent        | referent                    | referent        | referent                    | referent        |
| High School                 |                             |                 | −7 (−11 to −2)              | 0.01            | −6 (−11 to −2)              | 0.01            | −6 (−10 to −2)              | 0.01            |
| <High School                |                             |                 | −7 (−13 to −1)              | 0.02            | −7 (−13 to −1)              | 0.02            | −7 (−10 to −1)              | 0.03            |
| PIR                         |                             |                 |                             |                 |                             |                 |                             |                 |
| ≤0.99                       |                             |                 | referent                    | referent        | referent                    | referent        | referent                    | referent        |
| ≥1                          |                             |                 | 4 (−2 to 9)                 | 0.18            | 3 (−2 to 9)                 | 0.25            | 3 (−3 to 9)                 | 0.28            |
| Marital Status              |                             |                 |                             |                 |                             |                 |                             |                 |
| Married/Living with partner |                             |                 | referent                    | referent        | referent                    | referent        | referent                    | referent        |
| Widowed/Divorced/Separated  |                             |                 | −2 (−6 to 3)                | 0.46            | −2 (−6 to 2)                | 0.39            | −1 (−6 to 3)                | 0.49            |
| Alcohol Consumption         |                             |                 |                             |                 |                             |                 |                             |                 |
| <12 drinks/yr               |                             |                 |                             |                 | referent                    | referent        | referent                    | referent        |
| >12 drinks/yr               |                             |                 |                             |                 | 1 (−3 to 5)                 | 0.47            | 2 (−3 to 6)                 | 0.48            |
| HTN                         |                             |                 |                             |                 |                             |                 |                             |                 |
| No                          |                             |                 |                             |                 |                             |                 | referent                    | referent        |
| Yes                         |                             |                 |                             |                 |                             |                 | −4 (−8 to 1)                | 0.12            |
| DM                          |                             |                 |                             |                 |                             |                 |                             |                 |
| No                          |                             |                 |                             |                 |                             |                 | referent                    | referent        |
| Yes                         |                             |                 |                             |                 |                             |                 | 1 (−2 to 5)                 | 0.52            |
| Stroke                      |                             |                 |                             |                 |                             |                 |                             |                 |





|               |               |          |                 |          |
|---------------|---------------|----------|-----------------|----------|
| <12 drinks/yr | referent      | referent | referent        | referent |
| >12 drinks/yr | 10 (−1 to 30) | 0.07     | 10 (−1 to 30)   | 0.06     |
| HTN           |               |          |                 |          |
| No            |               |          | referent        | referent |
| Yes           |               |          | −10 (−20 to −2) | 0.02     |
| DM            |               |          |                 |          |
| No            |               |          | referent        | referent |
| Yes           |               |          | −7 (−20 to 5)   | 0.23     |
| Stroke        |               |          |                 |          |
| No            |               |          | referent        | referent |
| Yes           |               |          | −3 (−20 to 10)  | 0.74     |
| CAD           |               |          |                 |          |
| No            |               |          | referent        | referent |
| Yes           |               |          | −20 (−40 to 10) | 0.23     |

\*Unadjusted. † Adjusted for age, gender, ethnicity, education, PIR, and marital status. ‡ Adjusted for age, gender, ethnicity, education, PIR, marital status, and alcohol consumption. § Adjusted for age, gender, ethnicity, education, PIR, marital status, alcohol consumption, HTN, DM, stroke, and CAD. ¶ Weighted  $\beta$  and 95% Confidence Interval.

**Table S8.** Mn-Urine levels (continuous) in relation to cognitive function.

| Variables      | Model 1 ( <i>n</i> = 2068)* |                 | Model 2 ( <i>n</i> = 1772)† |                 | Model 3 ( <i>n</i> = 1744)‡ |                 | Model 4 ( <i>n</i> = 1650)§ |                 |
|----------------|-----------------------------|-----------------|-----------------------------|-----------------|-----------------------------|-----------------|-----------------------------|-----------------|
|                | $\beta$ (95% CI)¶           | <i>P</i> -value |
| Mn             | −0.3 (−1 to 0.3)            | 0.3073          | −0.6 (−1 to 0.3)            | 0.1916          | −0.6 (−1 to 0.0)            | 0.1298          | −1 (−2 to 0.3)              | 0.0804          |
| Gender         |                             |                 |                             |                 |                             |                 |                             |                 |
| Male           |                             |                 | referent                    | referent        | referent                    | referent        | referent                    | referent        |
| Female         |                             |                 | 3 (2 to 4)                  | <0.0001         | 3 (02 to 4)                 | <0.0001         | 3 (2 to 4)                  | <0.0001         |
| Age (year)     |                             |                 | −1 (−1 to −0.5)             | <0.0001         | −0.5 (−1 to −0.4)           | <0.0001         | −0.5 (−1 to −0.4)           | <0.0001         |
| Race/Ethnicity |                             |                 |                             |                 |                             |                 |                             |                 |
| NH White       |                             |                 | referent                    | referent        | referent                    | referent        | referent                    | referent        |
| Hispanic       |                             |                 | −5 (−6 to −4)               | <0.0001         | −5 (−6 to −4)               | <0.0001         | −5 (−7 to −4)               | <0.0001         |
| NH Black       |                             |                 | −4 (−5 to −2)               | <0.0001         | −3 (−5 to −2)               | <0.0001         | −3 (−5 to −2)               | <0.0001         |
| Other Race     |                             |                 | −3 (−5 to −1)               | 0.0132          | −2 (−4 to 0.4)              | 0.0167          | −2 (−4 to 0.4)              | 0.0222          |
| Education      |                             |                 |                             |                 |                             |                 |                             |                 |
| >High School   |                             |                 | referent                    | referent        | referent                    | referent        | referent                    | referent        |

|                             |                  |          |                  |          |                  |          |
|-----------------------------|------------------|----------|------------------|----------|------------------|----------|
| High School                 | −5 (−7 to −4)    | <0.0001  | −5 (−5 to −2)    | <0.0001  | −5 (−6 to −3)    | <0.0001  |
| <High School                | −4 (−5 to −3)    | <0.0001  | −4 (−5 to −2)    | <0.0001  | −3 (−5 to −2)    | <0.0001  |
| PIR                         |                  |          |                  |          |                  |          |
| ≤0.99                       | referent         | referent | referent         | referent | referent         | referent |
| ≥1                          | 2 (0.4 to 4)     | 0.0172   | 2 (0.2 to 4)     | 0.0334   | 2 (0.4 to 4)     | 0.0466   |
| Marital Status              |                  |          |                  |          |                  |          |
| Married/Living with partner | referent         | referent | referent         | referent | referent         | referent |
| Widowed/Divorced/Separated  | −0.7 (−2 to 0.8) | 0.3549   | −0.8 (−2 to 0.6) | 0.2856   | −0.7 (−2 to 0.6) | 0.2821   |
| Never married               | −0.6 (−3 to 2)   | 0.615    | −0.6 (−3 to 2)   | 0.6064   | −0.7 (−3 to 2)   | 0.5302   |
| Alcohol Consumption         |                  |          |                  |          |                  |          |
| <12 drinks/yr               |                  |          | referent         | referent | referent         | referent |
| >12 drinks/yr               |                  |          | 2 (0.1 to 3)     | 0.0363   | 1 (0.003 to 3)   | 0.0504   |
| HTN                         |                  |          |                  |          |                  |          |
| No                          |                  |          |                  |          | referent         | referent |
| Yes                         |                  |          |                  |          | −1 (−3 to −0.1)  | 0.0328   |
| DM                          |                  |          |                  |          |                  |          |
| No                          |                  |          |                  |          | referent         | referent |
| Yes                         |                  |          |                  |          | −1 (−2 to −0.2)  | 0.0186   |
| Stroke                      |                  |          |                  |          |                  |          |
| No                          |                  |          |                  |          | referent         | referent |
| Yes                         |                  |          |                  |          | −2 (−4 to −0.5)  | 0.1277   |
| CAD                         |                  |          |                  |          |                  |          |
| No                          |                  |          |                  |          | referent         | referent |
| Yes                         |                  |          |                  |          | −2 (−6 to −0.2)  | 0.3299   |

\*\*Unadjusted. † Adjusted for age, gender, ethnicity, education, PIR, and marital status. ‡ Adjusted for age, gender, ethnicity, education, PIR, marital status, and alcohol consumption. § Adjusted for age, gender, ethnicity, education, PIR, marital status, alcohol consumption, HTN, DM, stroke, and CAD. ¶ Weighted  $\beta$  and 95% Confidence Interval.
